# Supplementary material
Source: HighWire-hosted journal article supplement (https://bmjopen.bmj.com/content/10/7/e036433)
Supplement: inline-supplementary-material-2 [file inline-supplementary-material-2.pdf]

**Appendix 1:** Participant timeline for outcome measurements.

|                       | One week before<br>orthoses first use | Fist day<br>orthoses use | After 1 week<br>of orthoses use | After 6 months<br>of orthoses use | After 12 months<br>of orthoses use |
|-----------------------|---------------------------------------|--------------------------|---------------------------------|-----------------------------------|------------------------------------|
| GENEActiv<br>bracelet | x                                     | x                        |                                 | x                                 | x                                  |
| VAS                   | x                                     |                          | x                               | x                                 | x                                  |
| FAAM and<br>FHSQ      | x                                     |                          |                                 | x                                 | x                                  |
| Interviews            | x                                     |                          |                                 | x                                 | x                                  |
